# Supplementary material for: Simple Model for Identifying Critical Regions in Atrial Fibrillation
Source: PubMed Central journal article supplement (PMC4340556; doi:10.1103/physrevlett.114.028104), 2015-01-16
Supplement: NIHMS61928-supplement-Supplementary_Materials.pdf [file NIHMS61928-supplement-Supplementary_Materials.pdf]

# 1 Supplementary Materials

## Risk of AF

We identify the risk of developing atrial fibrillation in a model with the probability,  $P_{\text{risk}}$ , that the  $L \times L$  system has at least one portion of the reentrant circuit as displayed in Fig. 2(e). In our simple model, we can calculate  $P_{\text{risk}}$  analytically. The probability that a transverse coupling exists is given by  $\nu$ . The probability that a cell has at least one transverse coupling,  $p_\nu$ , is the complement of having no transverse couplings, that is,

$$p_\nu = 1 - (1 - \nu)^2. \quad (1)$$

Given an arbitrary dysfunctional cell  $i$ , let  $\ell_i$  denote the distance (measured in number of links) from that cell to its first neighbour to the right that has at least one transverse coupling. Hence, the probability that  $\ell_i < \ell_{\min}$

$$P(\ell_i < \ell_{\min}) = \sum_{\ell_i=0}^{\ell_{\min}-1} (1 - p_\nu)^{\ell_i} p_\nu = 1 - (1 - p_\nu)^{\ell_{\min}} = 1 - (1 - \nu)^{2\ell_{\min}}, \quad (2)$$

that is, the complement satisfies

$$P(\ell \geq \ell_{\min}) = (1 - \nu)^{2\ell_{\min}}. \quad (3)$$

A micro re-entry circuit may not form if the path length of the potential re-entry circuit is less than the refractory period. That happens when  $\ell_{\min} = \tau/2$  (for even  $\tau$ ) and we find that

$$P\left(\ell_i < \frac{\tau}{2}\right) = 1 - (1 - \nu)^\tau. \quad (4)$$

The average number of dysfunctional cells in a system is given by  $\delta L^2$ .  $P_{\text{risk}}$  is the complement of all dysfunctional cells having  $\ell_i < \frac{\tau}{2}$ , that is,

$$P_{\text{risk}} = 1 - \prod_{\text{dysfct. cells}} P(\ell_i < \ell_{\min}) = 1 - [1 - (1 - \nu)^\tau]^{\delta L^2}. \quad (5)$$

In the calculation above, we have treated all sites equally, that is, we have ignored boundary effects. We will now redo the calculation rigorously in a

finite system. The finiteness of the system implies that for a given dysfunctional cell  $i$ , there is a maximum distance  $L - i$  to its first neighbour to the right that has at least one transverse couplings. Hence

$$\begin{aligned}
P(\ell_i \geq \ell_{\min}) &= \begin{cases} \sum_{\ell_i=\ell_{\min}}^{L-1} (1-p_\nu)^{\ell_i} p_\nu & \text{for } \ell_{\min} \leq L-i \\ 0 & \text{for } \ell_{\min} > L-i \end{cases} \\
&= \begin{cases} (1-p_\nu)^{\ell_{\min}} - (1-p_\nu)^{L-i+1} & \text{for } \ell_{\min} \leq L-i \\ 0 & \text{for } \ell_{\min} > L-i, \end{cases} \quad (6)
\end{aligned}$$

and we find that

$$P(\ell_i < \ell_{\min}) = \begin{cases} 1 - (1-\nu)^{2\ell_{\min}} - (1-\nu)^{2(L-i+1)} & \text{for } \ell_{\min} \leq L-i \\ 1 & \text{for } \ell_{\min} > L-i. \end{cases} \quad (7)$$

A reentrant circuit may not form if the path length of the circuit is less than the refractory period. That happens when  $\ell_{\min} = \tau/2$ . The probability that all dysfunctional cells have  $\ell_i < \tau/2$  is given by  $\prod_{\text{dysfct. cells}} P(\ell_i < \tau/2)$ . Note, however, that only dysfunctional cells with  $i = 1, \dots, L - \tau/2$  contribute with a factor less than one. For each  $i = 1, \dots, L$ , the average number of dysfunctional cells is  $\delta L$ . Hence, the risk that a system has at least one critical region is given by

$$\begin{aligned}
P_{\text{risk}} &= 1 - \prod_{\text{dysfct. cells}} P(\ell_i < \tau/2) \\
&= 1 - \prod_{i=1}^{L-\tau/2} \left[ 1 - (1-\nu)^\tau - (1-\nu)^{2(L-i+1)} \right]^{\delta L}. \quad (8)
\end{aligned}$$

Note that for  $\nu = 1$  and  $\nu = 0$ ,  $P_{\text{risk}} = 0$  for all values of  $\delta L \neq 0$  and that  $P_{\text{risk}} = 0$  when no dysfunctional cells are present,  $\delta = 0$ . It is also interesting to note that for  $0 < \nu < 1$ ,

$$\lim_{L \rightarrow \infty} P_{\text{risk}} = 1, \quad (9)$$

that is, the quite abrupt transition from normal heart rhythm to fibrillatory behaviour seen when the fraction of transverse connections decreases below a critical value is technically an effect of the system having finite size. Un-

usually, though, as we will prove below, this finite-size effect disappear extremely slowly and hence it is physically relevant for all system sizes and is even present for systems with an area the size of the Earth.

### Estimating the threshold for fraction of transverse connections $\nu$

We define the threshold for the fraction of transverse connections as the value of  $\nu^*$  where the slope of the graph of  $P_{\text{risk}}$  vs.  $\nu$  is steepest. For simplicity, we consider the result where boundary effects are ignored, that is,

$$P_{\text{risk}} = 1 - [1 - (1 - \nu)^\tau]^{\delta L^2}. \quad (10)$$

We are searching for the non-trivial  $\nu^*$  that solves  $\frac{\partial^2 P_{\text{risk}}}{\partial \nu^2} = 0$ . We find that

$$\frac{\partial P_{\text{risk}}}{\partial \nu} = -\delta L^2 [1 - (1 - \nu)^\tau]^{\delta L^2 - 1} \tau (1 - \nu)^{\tau - 1}. \quad (11)$$

Hence,  $\frac{\partial P_{\text{risk}}}{\partial \nu} < 0$  for  $0 < \nu < 1$  implying that  $P_{\text{risk}}$  is a monotonic decreasing function of  $\nu$ . We find that

$$\frac{\partial^2 P_{\text{risk}}}{\partial \nu^2} = -\delta L^2 [1 - (1 - \nu)^\tau]^{\delta L^2 - 2} \tau (1 - \nu)^{\tau - 2} [(\delta L^2 - 1) \tau (1 - \nu)^\tau - [1 - (1 - \nu)^\tau] (\tau - 1)]. \quad (12)$$

Therefore,

$$\frac{\partial^2 P_{\text{risk}}}{\partial \nu^2} = 0 \Leftrightarrow \nu = \begin{cases} 0 \\ 1 \end{cases} \quad (13)$$

or that  $\nu^*$  satisfies the equation

$$(\delta L^2 - 1) \tau (1 - \nu^*)^\tau - (\tau - 1) + (1 - \nu^*)^\tau (\tau - 1) = 0. \quad (14)$$

We solve this equation with respect to  $1 - \nu^*$ :

$$1 - \nu^* = \left( \frac{\tau - 1}{\delta L^2 \tau - 1} \right)^{1/\tau} \approx (\delta L^2)^{-1/\tau}, \quad (15)$$

because to a good approximation,  $\tau \gg 1$  and  $\delta L^2 \tau \gg 1$ . Setting  $\delta = 0.05$ ,  $\tau = 50$  and  $L = 200$ , we estimate the threshold  $\nu^*$  where  $P_{\text{risk}}$  picks up quite abruptly to be at

$$1 - \nu^* \approx 0.86 \Leftrightarrow \nu^* \approx 0.14. \quad (16)$$

It is interesting to note that the threshold approaches 1 like  $L^{-2/\tau}$ , that is, extremely slowly. For example, the threshold reaches  $\nu^* = 0.63$  for  $L = 5 \times 10^{11}$ , corresponding to an atria with an area the size of the Earth. Hence, although the transition is technically a finite-size effect, it is relevant for all system sizes and only disappears when  $L = \infty$ .

### 3D Sheet

We now calculate  $P_{\text{risk}}$  for multiple sheets. Consider  $w$  parallel sheets of size  $L \times L$ . Each sheet has periodic boundary conditions transversally and open boundary conditions longitudinally. This results in a cylindrical topology with cylinder thickness  $w$ . The probability that a cell has at least one transverse coupling,  $p_\nu$ , is the complement of having no transverse couplings, that is,

$$p_\nu = 1 - (1 - \nu)^n, \quad (17)$$

where  $n = 3$  if a cell is at the surface and  $n = 4$  if the cell is within the bulk of the tissue.

The probability that an arbitrary dysfunctional cell,  $i$ , is a distance  $\ell_i < \ell_{\text{min}}$  becomes:

$$P(\ell_i < \ell_{\text{min}}) = 1 - (1 - p_\nu)^{n\ell_{\text{min}}} \quad (18)$$

So the probability that all dysfunctional cells (on average  $\delta w(L - 2)^2$ ) have  $\ell_i < \ell_{\text{min}} = \frac{\tau}{2}$  is

$$P_{\text{risk}} = 1 - \prod_{\substack{\text{dysfct.} \\ \text{cells}}} P\left(\ell_i < \frac{\tau}{2}\right) = 1 - \left[1 - (1 - \nu)^{\frac{3}{2}\tau}\right]^{2\delta L^2} \left[1 - (1 - \nu)^{2\tau}\right]^{(w-2)\delta L^2} \quad (19)$$

The curve still shows a sudden transition (see supplementary Fig. 1). We show this for  $\delta = 0.05$ ,  $\tau = 50$ ,  $w = 7$  and  $L = 200$ .

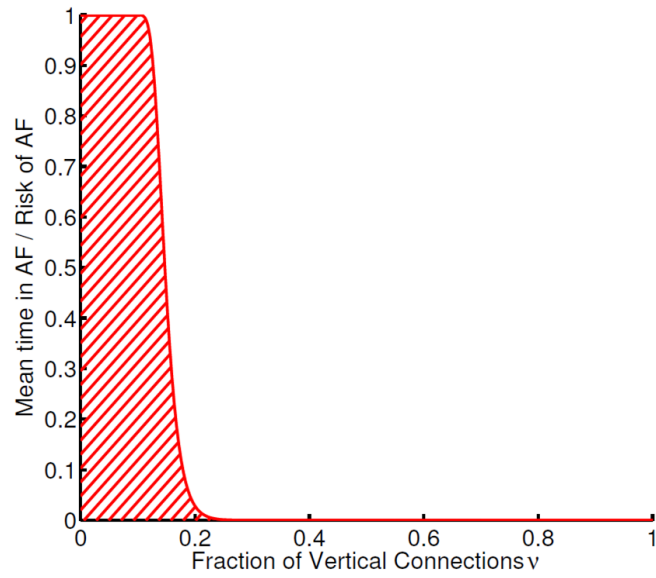

**Figure 1:** The probability that a three dimensional substrate, that is, a cylinder with finite thickness, develops AF,  $P_{\text{risk}}$ . A sudden transition as the transversal coupling is varied remains.

### Additional Figures

The figures shown in the manuscript were enlarged subsections of the full system size. For completeness we include the images for the full system size.

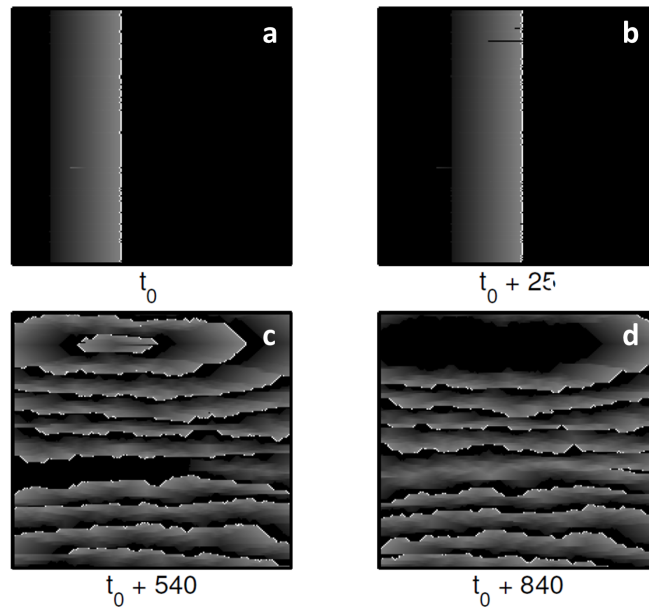

**Figure 2:** The initiation and termination of a re-entry circuit. This is the full  $200 \times 200$  system of the sub-section show in Fig. 2 of the manuscript.

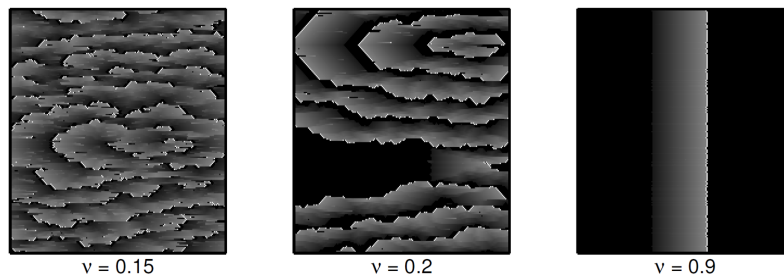

**Figure 3:** Complexity of wave behaviour at different levels of vertical coupling. This is the full  $200 \times 200$  system of the sub-section show in Fig. 3 of the manuscript.

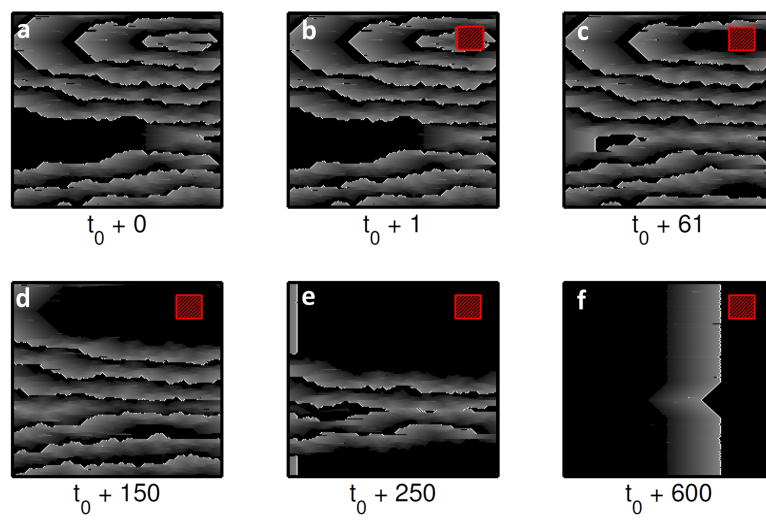

**Figure 4:** A region of tissue is made unexcitable simulating ablation. This is the full  $200 \times 200$  system of the sub-section show in Fig. 4 of the manuscript.
